# Supplementary material
Source: publisher figshare collection journal article supplement (https://sage.figshare.com/ndownloader/files/17890160)
Supplement: Supplementary file 1 [file 17890160]

**Table A1.** Results for the cluster analysis.

| Subcriteria                                                                                           | Cluster | Subcriteria                                            | Cluster | Subcriteria                                                                                                               | Cluster |
|-------------------------------------------------------------------------------------------------------|---------|--------------------------------------------------------|---------|---------------------------------------------------------------------------------------------------------------------------|---------|
| The development of a strong target image                                                              | 1       | Community support for special events                   | 1       | Innovation projects are usually met on time and on budget                                                                 | 1       |
| The selection of appropriate target markets (groups of tourists)                                      | 1       | Nightlife (bars, discos ...)                           | 1       | Employees work well together and also across departmental boundaries                                                      | 1       |
| The development of strong links with wholesalers and tourist retailers                                | 1       | Local transport efficiency and quality                 | 1       | The company spends time reviewing our projects to improve them and performance in the following actions                   | 1       |
| Go beyond the seasonality (low season and high season) in the visits of the tourists                  | 1       | Diversity of shopping experience                       | 1       | The company understands very well the needs of its consumers / end users                                                  | 1       |
| Increase the duration of the tourist's stay                                                           | 1       | Thematic parks                                         | 1       | Employees recognize that it is important for the organization to be competitive. distinguishing competence (s)            | 1       |
| Use of modern advanced information systems and technology (eg Internet)                               | 1       | Hospital and health infrastructures                    | 1       | The company has mechanisms that verify that all consumer needs are really understood (not just at the marketing level)    | 1       |
| Promotion and operation of tourism to attract tourists and international visitors                     | 1       | Financial institutions and easy exchange               | 1       | Employees are involved in suggesting ideas to improve products or processes                                               | 1       |
| Increase tourist spending                                                                             | 1       | Animation                                              | 1       | The organization works with universities and other research centers that can help you develop your knowledge              | 1       |
| Setting standards for tourist facilities                                                              | 1       | Quality of tourist services                            | 1       | The company analyzes its errors in order to improve its activities and processes                                          | 1       |
| Education and training programs for present / future industry personnel                               | 1       | Telecommunications                                     | 1       | The company looks to the future in order to anticipate threats and opportunities (using tools and forecasting techniques) | 1       |
| Establishing the cost to provide different levels of quality for various types of tourism experiences | 1       | Destination Accessibility                              | 1       | The company has process management mechanisms that allow it to tailor procedures to ensure its ultimate success           | 1       |
| The role / function of local government and agencies as facilitators of tourism development           | 1       | Communication and trust between tourists and residents | 1       | The structure of the company helps to make quick decisions                                                                | 1       |

|                                                                                                                        |   |                                                                                        |   |                                                                                                                                             |   |
|------------------------------------------------------------------------------------------------------------------------|---|----------------------------------------------------------------------------------------|---|---------------------------------------------------------------------------------------------------------------------------------------------|---|
| The leading roles of local government and agencies in the region's Marketing as a tourist destination                  | 1 | Efficiency of Customs and Emigration Services                                          | 1 | The company works very close to its consumers in order to develop new concepts                                                              | 1 |
| The development of security programs and systems for tourists and the tourist community                                | 1 | Attitude of Customs and Emigration Services                                            | 1 | The company systematically compares its products and processes with those of its competitors                                                | 1 |
| Collect information to survey the products and services of a destination                                               | 1 | Hospitality of residents with tourists                                                 | 1 | The employees (/ professionals?) Who occupy top positions have a come innovation as a determining factor for the development of the company | 1 |
| An inventory of information to monitor the attitudes of the local population towards the tourism sector                | 1 | Visitor Security                                                                       | 1 | The company searches for new ideas for new products in a systematic way                                                                     | 1 |
| Research that assists in the development of new tourist services                                                       | 1 | Political stability                                                                    | 1 | Communication between the various levels of hierarchy works effectively                                                                     | 1 |
| Protect and further improve the habitat of wildlife                                                                    | 1 | Value for Money in tourist experiences                                                 | 1 | The company collaborates with other companies in the development of new products or processes                                               | 1 |
| Promote ethical responsibility towards the natural environment                                                         | 1 | Value for Money accommodation                                                          | 1 | The company shares experiences with other companies that help them understand them                                                          | 1 |
| Expand educational opportunities for the visiting public in terms of quality and protection of the natural environment | 1 | Management skills                                                                      | 1 | Those in top positions show a commitment to support innovation                                                                              | 1 |
| Encourage citizen participation in tourism development decision-making                                                 | 1 | Existence of tourist programs                                                          | 1 | The company has mechanisms that ensure the involvement of all departments in the development of new products or processes                   | 1 |
| Sensitive use of natural resources                                                                                     | 1 | Recognition by the public sector of the importance of sustainable tourism development  | 1 | The company has a system of support and reward for innovation initiatives                                                                   | 1 |
| Environmental considerations in tourism marketing                                                                      | 1 | Recognition by the private sector of the importance of sustainable tourism development | 1 | The company tries to develop external networks with individuals who can assist it (for example with experts in specific knowledge)          | 1 |

|                                                |   |                                                                                  |   |                                                                                                                                               |   |
|------------------------------------------------|---|----------------------------------------------------------------------------------|---|-----------------------------------------------------------------------------------------------------------------------------------------------|---|
| Environmental training of the tourism team     | 1 | Use of e-commerce                                                                | 1 | The company records its developmental evolution so that other people in the organization can take advantage of such learning                  | 1 |
| Cleaning                                       | 1 | Use of Information Technology by Companies                                       | 1 | The organization has mechanisms to analyze the new technological and market developments and what their impact on the organization's strategy | 1 |
| Attractiveness of the tourism climate          | 1 | Cooperation between public and private sector companies                          | 1 | The organization has a clear system of choosing innovation projects                                                                           | 1 |
| Preserved nature                               | 1 | Quality of entrepreneurship in local tourism businesses                          | 1 | The organization has a favorable climate for the creation of new ideas, which encourages employees to make their proposals                    | 1 |
| Flora and fauna                                | 1 | Efficiency of tourism and hotel companies                                        | 1 | The organization learns from other organizations                                                                                              | 1 |
| Traditional Arts                               | 1 | Existence and adequacy of teaching in Tourism                                    | 1 | There is a clear link between innovation projects and the entire business strategy                                                            | 1 |
| Architectural and Artistic Resources           | 1 | Adequacy of training in tourism and hospitality related to the needs of visitors | 1 | The organization's system is flexible and helps the quick realization of small projects                                                       | 1 |
| Historic Sites                                 | 1 | Destination vision regarding tourism values                                      | 1 | The organization works well as a team (or teams)                                                                                              | 1 |
| Patrimony                                      | 1 | Destination view of resident values                                              | 1 | The organization works closely with users of its new products or services                                                                     | 1 |
| National Parks                                 | 1 | Destination vision regarding stakeholder values                                  | 1 | The organization uses measures that help you identify where and when you can improve your innovation                                          | 1 |
| Water Activities                               | 1 | Destination vision regarding community values                                    | 1 | The organization shares its needs and competencies with education agencies                                                                    | 2 |
| Activities in Nature                           | 1 | Development and promotion of new tourism products                                | 1 | Financing                                                                                                                                     | 2 |
| Facilities / Infrastructure                    | 1 | Specific policies on social tourism (reduced mobility, elderly ...)              | 1 | Insufficient equity                                                                                                                           | 2 |
| Sports facilities (Golf, Tennis, football ...) | 1 | Quality of research for tourism, planning and development policies               | 1 | Insufficient external capital                                                                                                                 | 2 |
| Adventure activities                           | 1 | Development of integrated tourism with the general development of the industrial | 1 | High wage costs                                                                                                                               | 2 |

|                                                  |   |                                                                                                                    |   |                                                                                |   |
|--------------------------------------------------|---|--------------------------------------------------------------------------------------------------------------------|---|--------------------------------------------------------------------------------|---|
| Gastronomic service facilities                   | 1 | General image of the destination                                                                                   | 1 | Difficult forecast of demand                                                   | 2 |
| Gourmet Variety                                  | 1 | International knowledge of destination products                                                                    | 1 | Lack of qualified staff                                                        | 2 |
| Accessibility of visitors to natural areas       | 1 | Framing between destination products and visitor preferences                                                       | 1 | Investigation and development                                                  | 2 |
| Congress tourism                                 | 1 | International knowledge of destiny                                                                                 | 1 | Production                                                                     | 2 |
| rural tourism                                    | 1 | Structure / profile of tourism professionals                                                                       | 1 | Marketing and Sales                                                            | 2 |
| Spa and health resorts                           | 1 | Effective development of destination brand                                                                         | 1 | Innovations difficult to organize                                              | 2 |
| Accommodation (quality and diversity)            | 1 | The company's employees recognize the importance of innovation for competitiveness                                 | 1 | Cooperation possibilities Insufficient                                         | 2 |
| Quality and efficiency of Airports               | 1 | The company has mechanisms that assist it in the management of new products from the idea of its launch            | 1 | With other companies                                                           | 2 |
| Tourist information and referral                 | 1 | The structure of the company does not compromise innovation, but helps its development                             | 1 | With research organizations                                                    | 2 |
| Special events and festivals                     | 1 | There is a great commitment to the training of employees                                                           | 1 | Insufficient access to knowledge produced in universities and research centers | 2 |
| Entertainment (Theaters, galleries, cinemas ...) | 1 | The company has a good relationship (win-win) with suppliers                                                       | 1 | Insufficient access to external information                                    | 2 |
| Casino                                           | 1 | The company's innovation strategy is shared clearly with all employees so that they know the goals to be fulfilled | 1 | Other obstacles                                                                | 2 |

**Table A2.** Results for sub-criteria weights and information entropy.

| Criteria                                                                                                                                                 | Subcriteria                                                                                           | Final Weights |           |            |           |                 |               |                    |                  |              |                 | Criteria Information Entropy | Subcriteria Information Entropy |
|----------------------------------------------------------------------------------------------------------------------------------------------------------|-------------------------------------------------------------------------------------------------------|---------------|-----------|------------|-----------|-----------------|---------------|--------------------|------------------|--------------|-----------------|------------------------------|---------------------------------|
|                                                                                                                                                          |                                                                                                       | Fuzzy IRT     | Fuzzy AHP | AHP linear | AHP Power | AHP Root Square | AHP Geometric | AHP Inverse Linear | AHP Asymptotical | AHP Balanced | AHP Logarithmic |                              |                                 |
| Criteria 7 =<br>Please indicate how favorable or unfavorable each of the following actions and competitiveness strategies of the Tourist Destination RAM | The development of a strong target image                                                              | 0.0094        | 0.0053    | 0.0118     | 0.0177    | 0.0091          | 0.0114        | 0.0075             | 0.0003           | 0.0080       | 0.0100          | 0.9459                       | 0.9388                          |
|                                                                                                                                                          | The selection of appropriate target markets (groups of tourists)                                      | 0.0083        | 0.0053    | 0.0121     | 0.0185    | 0.0092          | 0.0119        | 0.0075             | 0.0004           | 0.0081       | 0.0100          |                              | 0.9364                          |
|                                                                                                                                                          | The development of strong links with wholesalers and tourist retailers                                | 0.0076        | 0.0052    | 0.0128     | 0.0219    | 0.0094          | 0.0165        | 0.0078             | 0.0004           | 0.0085       | 0.0103          |                              | 0.9232                          |
|                                                                                                                                                          | Go beyond the seasonality (low season and high season) in the visits of the tourists                  | 0.0091        | 0.0053    | 0.0118     | 0.0177    | 0.0091          | 0.0116        | 0.0075             | 0.0004           | 0.0080       | 0.0099          |                              | 0.9397                          |
|                                                                                                                                                          | Increase the duration of the tourist's stay                                                           | 0.0085        | 0.0053    | 0.0118     | 0.0179    | 0.0091          | 0.0122        | 0.0075             | 0.0004           | 0.0080       | 0.0099          |                              | 0.9385                          |
|                                                                                                                                                          | Use of modern advanced information systems and technology (eg Internet)                               | 0.0100        | 0.0054    | 0.0113     | 0.0162    | 0.0089          | 0.0110        | 0.0074             | 0.0004           | 0.0078       | 0.0096          |                              | 0.9440                          |
|                                                                                                                                                          | Promotion and operation of tourism to attract tourists and international visitors                     | 0.0095        | 0.0054    | 0.0113     | 0.0161    | 0.0089          | 0.0110        | 0.0074             | 0.0004           | 0.0078       | 0.0096          |                              | 0.9444                          |
|                                                                                                                                                          | Increase tourist spending                                                                             | 0.0087        | 0.0054    | 0.0115     | 0.0171    | 0.0089          | 0.0120        | 0.0075             | 0.0004           | 0.0080       | 0.0097          |                              | 0.9417                          |
|                                                                                                                                                          | Setting standards for tourist facilities                                                              | 0.0072        | 0.0053    | 0.0115     | 0.0171    | 0.0090          | 0.0121        | 0.0075             | 0.0005           | 0.0081       | 0.0097          |                              | 0.9404                          |
|                                                                                                                                                          | Education and training programs for present / future industry personnel                               | 0.0076        | 0.0054    | 0.0120     | 0.0191    | 0.0091          | 0.0148        | 0.0078             | 0.0005           | 0.0084       | 0.0099          |                              | 0.9349                          |
|                                                                                                                                                          | Establishing the cost to provide different levels of quality for various types of tourism experiences | 0.0062        | 0.0054    | 0.0121     | 0.0198    | 0.0091          | 0.0167        | 0.0080             | 0.0006           | 0.0086       | 0.0099          |                              | 0.9277                          |
|                                                                                                                                                          | The role / function of local government and agencies as facilitators of tourism development           | 0.0089        | 0.0055    | 0.0112     | 0.0167    | 0.0088          | 0.0131        | 0.0076             | 0.0005           | 0.0080       | 0.0095          |                              | 0.9439                          |
|                                                                                                                                                          | The leading roles of local government and agencies in the region's Marketing as a tourist destination | 0.0087        | 0.0055    | 0.0111     | 0.0162    | 0.0088          | 0.0123        | 0.0075             | 0.0005           | 0.0080       | 0.0095          |                              | 0.9456                          |

|                                                                                                                       |                                                                                                                        |        |        |        |        |        |        |        |        |        |        |        |        |
|-----------------------------------------------------------------------------------------------------------------------|------------------------------------------------------------------------------------------------------------------------|--------|--------|--------|--------|--------|--------|--------|--------|--------|--------|--------|--------|
|                                                                                                                       | The development of security programs and systems for tourists and the tourist community                                | 0.0078 | 0.0055 | 0.0110 | 0.0157 | 0.0087 | 0.0117 | 0.0075 | 0.0005 | 0.0079 | 0.0094 |        | 0.9465 |
|                                                                                                                       | Collect information to survey the products and services of a destination                                               | 0.0081 | 0.0055 | 0.0108 | 0.0149 | 0.0086 | 0.0114 | 0.0075 | 0.0006 | 0.0079 | 0.0093 |        | 0.9494 |
|                                                                                                                       | An inventory of information to monitor the attitudes of the local population towards the tourism sector                | 0.0070 | 0.0055 | 0.0107 | 0.0146 | 0.0086 | 0.0106 | 0.0074 | 0.0005 | 0.0078 | 0.0093 |        | 0.9492 |
|                                                                                                                       | Research that assists in the development of new tourist services                                                       | 0.0077 | 0.0055 | 0.0104 | 0.0136 | 0.0085 | 0.0101 | 0.0073 | 0.0005 | 0.0077 | 0.0091 |        | 0.9527 |
|                                                                                                                       | Protect and further improve the habitat of wildlife                                                                    | 0.0094 | 0.0057 | 0.0104 | 0.0141 | 0.0085 | 0.0107 | 0.0073 | 0.0006 | 0.0077 | 0.0091 |        | 0.9526 |
|                                                                                                                       | Promote ethical responsibility towards the natural environment                                                         | 0.0094 | 0.0057 | 0.0103 | 0.0135 | 0.0084 | 0.0102 | 0.0073 | 0.0006 | 0.0076 | 0.0090 |        | 0.9543 |
|                                                                                                                       | Expand educational opportunities for the visiting public in terms of quality and protection of the natural environment | 0.0089 | 0.0057 | 0.0101 | 0.0129 | 0.0084 | 0.0098 | 0.0072 | 0.0006 | 0.0076 | 0.0089 |        | 0.9559 |
|                                                                                                                       | Encourage citizen participation in tourism development decision-making                                                 | 0.0071 | 0.0056 | 0.0104 | 0.0139 | 0.0085 | 0.0110 | 0.0074 | 0.0007 | 0.0078 | 0.0090 |        | 0.9528 |
|                                                                                                                       | Sensitive use of natural resources                                                                                     | 0.0088 | 0.0057 | 0.0101 | 0.0130 | 0.0084 | 0.0100 | 0.0073 | 0.0006 | 0.0076 | 0.0089 |        | 0.9566 |
|                                                                                                                       | Environmental considerations in tourism marketing                                                                      | 0.0091 | 0.0057 | 0.0099 | 0.0126 | 0.0083 | 0.0099 | 0.0072 | 0.0006 | 0.0076 | 0.0088 |        | 0.9576 |
|                                                                                                                       | Environmental training of the tourism team                                                                             | 0.0088 | 0.0058 | 0.0100 | 0.0129 | 0.0083 | 0.0106 | 0.0074 | 0.0007 | 0.0077 | 0.0088 |        | 0.9578 |
|                                                                                                                       | Cleaning                                                                                                               | 0.0096 | 0.0058 | 0.0096 | 0.0122 | 0.0081 | 0.0111 | 0.0073 | 0.0007 | 0.0076 | 0.0086 |        | 0.9581 |
| Criteria 8 =<br>According to the following factors, how does the RAM destination position compare to the competition? | Attractiveness of the tourism climate                                                                                  | 0.0105 | 0.0058 | 0.0091 | 0.0105 | 0.0080 | 0.0086 | 0.0071 | 0.0006 | 0.0073 | 0.0084 | 0.9743 | 0.9604 |
|                                                                                                                       | Preserved nature                                                                                                       | 0.0088 | 0.0058 | 0.0093 | 0.0109 | 0.0080 | 0.0089 | 0.0071 | 0.0007 | 0.0074 | 0.0085 |        | 0.9620 |
|                                                                                                                       | Flora and fauna                                                                                                        | 0.0097 | 0.0058 | 0.0090 | 0.0102 | 0.0079 | 0.0085 | 0.0071 | 0.0007 | 0.0073 | 0.0083 |        | 0.9624 |
|                                                                                                                       | Traditional Arts                                                                                                       | 0.0063 | 0.0057 | 0.0096 | 0.0120 | 0.0082 | 0.0099 | 0.0072 | 0.0008 | 0.0076 | 0.0086 |        | 0.9597 |
|                                                                                                                       | Architectural and Artistic Resources                                                                                   | 0.0054 | 0.0056 | 0.0094 | 0.0114 | 0.0081 | 0.0093 | 0.0072 | 0.0008 | 0.0076 | 0.0085 |        | 0.9596 |
|                                                                                                                       | Historic Sites                                                                                                         | 0.0059 | 0.0057 | 0.0094 | 0.0115 | 0.0081 | 0.0096 | 0.0072 | 0.0009 | 0.0076 | 0.0085 |        | 0.9610 |
|                                                                                                                       | Patrimony                                                                                                              | 0.0066 | 0.0057 | 0.0092 | 0.0109 | 0.0080 | 0.0092 | 0.0072 | 0.0009 | 0.0075 | 0.0084 |        | 0.9637 |
|                                                                                                                       | National Parks                                                                                                         | 0.0070 | 0.0057 | 0.0092 | 0.0109 | 0.0080 | 0.0093 | 0.0072 | 0.0009 | 0.0075 | 0.0084 |        | 0.9647 |

|                                                        |        |        |        |        |        |        |        |        |        |        |        |
|--------------------------------------------------------|--------|--------|--------|--------|--------|--------|--------|--------|--------|--------|--------|
| Water Activities                                       | 0.0070 | 0.0058 | 0.0089 | 0.0103 | 0.0079 | 0.0091 | 0.0071 | 0.0009 | 0.0074 | 0.0082 | 0.9658 |
| Activities in Nature                                   | 0.0099 | 0.0060 | 0.0084 | 0.0090 | 0.0077 | 0.0079 | 0.0070 | 0.0008 | 0.0072 | 0.0080 | 0.9662 |
| Facilities / Infrastructure                            | 0.0056 | 0.0057 | 0.0092 | 0.0109 | 0.0080 | 0.0092 | 0.0072 | 0.0010 | 0.0075 | 0.0084 | 0.9646 |
| Sports facilities (Golf, Tennis, football ...)         | 0.0061 | 0.0058 | 0.0088 | 0.0098 | 0.0078 | 0.0086 | 0.0071 | 0.0010 | 0.0074 | 0.0081 | 0.9675 |
| Adventure activities                                   | 0.0078 | 0.0059 | 0.0083 | 0.0089 | 0.0076 | 0.0080 | 0.0070 | 0.0009 | 0.0072 | 0.0079 | 0.9696 |
| Gastronomic service facilities                         | 0.0076 | 0.0059 | 0.0084 | 0.0089 | 0.0076 | 0.0080 | 0.0070 | 0.0010 | 0.0072 | 0.0079 | 0.9704 |
| Gourmet Variety                                        | 0.0074 | 0.0059 | 0.0084 | 0.0091 | 0.0077 | 0.0082 | 0.0070 | 0.0011 | 0.0072 | 0.0079 | 0.9710 |
| Accessibility of visitors to natural areas             | 0.0080 | 0.0060 | 0.0081 | 0.0084 | 0.0075 | 0.0077 | 0.0069 | 0.0010 | 0.0071 | 0.0078 | 0.9715 |
| Congress tourism                                       | 0.0046 | 0.0057 | 0.0090 | 0.0107 | 0.0079 | 0.0099 | 0.0073 | 0.0013 | 0.0076 | 0.0082 | 0.9647 |
| rural tourism                                          | 0.0071 | 0.0060 | 0.0080 | 0.0082 | 0.0075 | 0.0076 | 0.0069 | 0.0011 | 0.0071 | 0.0077 | 0.9729 |
| Spa and health resorts                                 | 0.0048 | 0.0059 | 0.0086 | 0.0096 | 0.0077 | 0.0087 | 0.0071 | 0.0013 | 0.0074 | 0.0080 | 0.9694 |
| Accommodation (quality and diversity)                  | 0.0083 | 0.0061 | 0.0077 | 0.0076 | 0.0074 | 0.0073 | 0.0069 | 0.0011 | 0.0070 | 0.0075 | 0.9734 |
| Quality and efficiency of Airports                     | 0.0054 | 0.0059 | 0.0086 | 0.0097 | 0.0077 | 0.0088 | 0.0071 | 0.0015 | 0.0074 | 0.0080 | 0.9728 |
| Tourist information and referral                       | 0.0059 | 0.0060 | 0.0081 | 0.0084 | 0.0075 | 0.0082 | 0.0071 | 0.0014 | 0.0073 | 0.0077 | 0.9755 |
| Special events and festivals                           | 0.0076 | 0.0062 | 0.0077 | 0.0076 | 0.0073 | 0.0076 | 0.0070 | 0.0013 | 0.0071 | 0.0075 | 0.9765 |
| Entertainment (Theaters, galleries, cinemas ...)       | 0.0043 | 0.0060 | 0.0082 | 0.0088 | 0.0076 | 0.0084 | 0.0071 | 0.0016 | 0.0073 | 0.0078 | 0.9728 |
| Casino                                                 | 0.0046 | 0.0060 | 0.0085 | 0.0096 | 0.0077 | 0.0091 | 0.0071 | 0.0018 | 0.0074 | 0.0079 | 0.9738 |
| Community support for special events                   | 0.0054 | 0.0061 | 0.0076 | 0.0074 | 0.0073 | 0.0074 | 0.0069 | 0.0014 | 0.0071 | 0.0074 | 0.9771 |
| Nightlife (bars, discos ...)                           | 0.0047 | 0.0060 | 0.0081 | 0.0086 | 0.0075 | 0.0084 | 0.0071 | 0.0018 | 0.0073 | 0.0077 | 0.9761 |
| Local transport efficiency and quality                 | 0.0053 | 0.0061 | 0.0079 | 0.0081 | 0.0074 | 0.0081 | 0.0071 | 0.0019 | 0.0073 | 0.0076 | 0.9797 |
| Diversity of shopping experience                       | 0.0039 | 0.0061 | 0.0079 | 0.0081 | 0.0074 | 0.0080 | 0.0070 | 0.0019 | 0.0072 | 0.0076 | 0.9758 |
| Thematic parks                                         | 0.0040 | 0.0060 | 0.0087 | 0.0102 | 0.0077 | 0.0103 | 0.0073 | 0.0026 | 0.0076 | 0.0080 | 0.9746 |
| Hospital and health infrastructures                    | 0.0047 | 0.0062 | 0.0083 | 0.0094 | 0.0075 | 0.0104 | 0.0073 | 0.0026 | 0.0076 | 0.0077 | 0.9781 |
| Financial institutions and easy exchange               | 0.0058 | 0.0062 | 0.0075 | 0.0074 | 0.0072 | 0.0081 | 0.0070 | 0.0020 | 0.0071 | 0.0073 | 0.9827 |
| Animation                                              | 0.0052 | 0.0063 | 0.0073 | 0.0068 | 0.0071 | 0.0072 | 0.0069 | 0.0019 | 0.0070 | 0.0072 | 0.9825 |
| Quality of tourist services                            | 0.0072 | 0.0064 | 0.0068 | 0.0059 | 0.0069 | 0.0065 | 0.0067 | 0.0017 | 0.0068 | 0.0069 | 0.9817 |
| Telecommunications                                     | 0.0078 | 0.0064 | 0.0067 | 0.0058 | 0.0069 | 0.0063 | 0.0067 | 0.0017 | 0.0067 | 0.0069 | 0.9813 |
| Destination Accessibility                              | 0.0059 | 0.0063 | 0.0072 | 0.0068 | 0.0071 | 0.0072 | 0.0068 | 0.0022 | 0.0070 | 0.0071 | 0.9861 |
| Communication and trust between tourists and residents | 0.0090 | 0.0065 | 0.0065 | 0.0054 | 0.0067 | 0.0061 | 0.0067 | 0.0017 | 0.0066 | 0.0067 | 0.9795 |
| Efficiency of Customs and Emigration Services          | 0.0060 | 0.0064 | 0.0069 | 0.0062 | 0.0069 | 0.0071 | 0.0068 | 0.0021 | 0.0069 | 0.0069 | 0.9857 |

|                                                                                                                                                                |                                                                                        |        |        |        |        |        |        |        |        |        |        |        |        |
|----------------------------------------------------------------------------------------------------------------------------------------------------------------|----------------------------------------------------------------------------------------|--------|--------|--------|--------|--------|--------|--------|--------|--------|--------|--------|--------|
| Criteria 9 = In view of the statements, what is your perception about the attitude of the destination RAM in relation to the competition / other destinations. | Attitude of Customs and Emigration Services                                            | 0.0052 | 0.0063 | 0.0069 | 0.0061 | 0.0069 | 0.0067 | 0.0068 | 0.0021 | 0.0069 | 0.0069 | 0.9924 | 0.9853 |
|                                                                                                                                                                | Hospitality of residents with tourists                                                 | 0.0099 | 0.0066 | 0.0063 | 0.0050 | 0.0066 | 0.0058 | 0.0066 | 0.0018 | 0.0065 | 0.0066 |        | 0.9770 |
|                                                                                                                                                                | Visitor Security                                                                       | 0.0110 | 0.0067 | 0.0062 | 0.0049 | 0.0066 | 0.0057 | 0.0066 | 0.0019 | 0.0065 | 0.0065 |        | 0.9734 |
|                                                                                                                                                                | Political stability                                                                    | 0.0085 | 0.0066 | 0.0065 | 0.0057 | 0.0067 | 0.0068 | 0.0067 | 0.0024 | 0.0067 | 0.0067 |        | 0.9858 |
|                                                                                                                                                                | Value for Money in tourist experiences                                                 | 0.0082 | 0.0066 | 0.0062 | 0.0049 | 0.0066 | 0.0058 | 0.0066 | 0.0021 | 0.0066 | 0.0065 |        | 0.9832 |
|                                                                                                                                                                | Value for Money accommodation                                                          | 0.0082 | 0.0066 | 0.0062 | 0.0048 | 0.0066 | 0.0057 | 0.0066 | 0.0021 | 0.0065 | 0.0065 |        | 0.9832 |
|                                                                                                                                                                | Management skills                                                                      | 0.0063 | 0.0066 | 0.0063 | 0.0050 | 0.0066 | 0.0059 | 0.0066 | 0.0023 | 0.0066 | 0.0065 |        | 0.9873 |
|                                                                                                                                                                | Existence of tourist programs                                                          | 0.0071 | 0.0067 | 0.0061 | 0.0048 | 0.0065 | 0.0058 | 0.0066 | 0.0024 | 0.0066 | 0.0065 |        | 0.9870 |
|                                                                                                                                                                | Recognition by the public sector of the importance of sustainable tourism development  | 0.0062 | 0.0066 | 0.0064 | 0.0054 | 0.0066 | 0.0064 | 0.0067 | 0.0028 | 0.0067 | 0.0066 |        | 0.9907 |
|                                                                                                                                                                | Recognition by the private sector of the importance of sustainable tourism development | 0.0062 | 0.0067 | 0.0061 | 0.0048 | 0.0065 | 0.0059 | 0.0066 | 0.0026 | 0.0066 | 0.0064 |        | 0.9891 |
|                                                                                                                                                                | Use of e-commerce                                                                      | 0.0054 | 0.0066 | 0.0063 | 0.0052 | 0.0066 | 0.0064 | 0.0067 | 0.0030 | 0.0067 | 0.0065 |        | 0.9915 |
|                                                                                                                                                                | Use of Information Technology by Companies                                             | 0.0066 | 0.0067 | 0.0060 | 0.0045 | 0.0064 | 0.0056 | 0.0066 | 0.0027 | 0.0065 | 0.0063 |        | 0.9888 |
|                                                                                                                                                                | Cooperation between public and private sector companies                                | 0.0054 | 0.0066 | 0.0063 | 0.0052 | 0.0066 | 0.0062 | 0.0067 | 0.0033 | 0.0067 | 0.0065 |        | 0.9928 |
|                                                                                                                                                                | Quality of entrepreneurship in local tourism businesses                                | 0.0065 | 0.0067 | 0.0059 | 0.0044 | 0.0064 | 0.0055 | 0.0066 | 0.0028 | 0.0065 | 0.0063 |        | 0.9893 |
|                                                                                                                                                                | Efficiency of tourism and hotel companies                                              | 0.0066 | 0.0068 | 0.0057 | 0.0042 | 0.0063 | 0.0054 | 0.0065 | 0.0028 | 0.0065 | 0.0062 |        | 0.9888 |
|                                                                                                                                                                | Existence and adequacy of teaching in Tourism                                          | 0.0052 | 0.0067 | 0.0061 | 0.0049 | 0.0065 | 0.0061 | 0.0067 | 0.0037 | 0.0067 | 0.0064 |        | 0.9939 |
|                                                                                                                                                                | Adequacy of training in tourism and hospitality related to the needs of visitors       | 0.0050 | 0.0067 | 0.0061 | 0.0048 | 0.0065 | 0.0060 | 0.0066 | 0.0038 | 0.0066 | 0.0064 |        | 0.9942 |
|                                                                                                                                                                | Destination vision regarding tourism values                                            | 0.0061 | 0.0068 | 0.0057 | 0.0042 | 0.0063 | 0.0054 | 0.0065 | 0.0033 | 0.0065 | 0.0061 |        | 0.9915 |
|                                                                                                                                                                | Destination view of resident values                                                    | 0.0057 | 0.0068 | 0.0057 | 0.0042 | 0.0063 | 0.0054 | 0.0065 | 0.0034 | 0.0065 | 0.0061 |        | 0.9921 |
|                                                                                                                                                                | Destination vision regarding stakeholder values                                        | 0.0050 | 0.0068 | 0.0058 | 0.0043 | 0.0063 | 0.0058 | 0.0066 | 0.0038 | 0.0066 | 0.0062 |        | 0.9933 |
|                                                                                                                                                                | Destination vision regarding community values                                          | 0.0054 | 0.0069 | 0.0056 | 0.0039 | 0.0062 | 0.0053 | 0.0065 | 0.0035 | 0.0064 | 0.0060 |        | 0.9918 |



|                                                                                               |                                                                                                                    |        |        |        |        |        |        |        |        |        |        |        |        |
|-----------------------------------------------------------------------------------------------|--------------------------------------------------------------------------------------------------------------------|--------|--------|--------|--------|--------|--------|--------|--------|--------|--------|--------|--------|
|                                                                                               | Development and promotion of new tourism products                                                                  | 0.0049 | 0.0068 | 0.0057 | 0.0042 | 0.0063 | 0.0055 | 0.0066 | 0.0043 | 0.0065 | 0.0061 |        | 0.9944 |
|                                                                                               | Specific policies on social tourism (reduced mobility, elderly ...)                                                | 0.0048 | 0.0068 | 0.0058 | 0.0044 | 0.0063 | 0.0059 | 0.0066 | 0.0048 | 0.0066 | 0.0062 |        | 0.9956 |
|                                                                                               | Quality of research for tourism, planning and development policies                                                 | 0.0041 | 0.0067 | 0.0058 | 0.0044 | 0.0063 | 0.0058 | 0.0066 | 0.0047 | 0.0066 | 0.0062 |        | 0.9941 |
|                                                                                               | Development of integrated tourism with the general development of the industrial                                   | 0.0040 | 0.0068 | 0.0056 | 0.0040 | 0.0062 | 0.0054 | 0.0065 | 0.0043 | 0.0065 | 0.0060 |        | 0.9921 |
|                                                                                               | General image of the destination                                                                                   | 0.0082 | 0.0072 | 0.0050 | 0.0032 | 0.0059 | 0.0047 | 0.0064 | 0.0037 | 0.0062 | 0.0057 |        | 0.9855 |
|                                                                                               | International knowledge of destination products                                                                    | 0.0065 | 0.0071 | 0.0053 | 0.0036 | 0.0061 | 0.0050 | 0.0064 | 0.0045 | 0.0063 | 0.0058 |        | 0.9927 |
|                                                                                               | Framing between destination products and visitor preferences                                                       | 0.0060 | 0.0071 | 0.0051 | 0.0034 | 0.0060 | 0.0048 | 0.0064 | 0.0043 | 0.0063 | 0.0057 |        | 0.9916 |
|                                                                                               | International knowledge of destiny                                                                                 | 0.0065 | 0.0072 | 0.0051 | 0.0034 | 0.0060 | 0.0048 | 0.0064 | 0.0047 | 0.0062 | 0.0057 |        | 0.9918 |
|                                                                                               | Structure / profile of tourism professionals                                                                       | 0.0057 | 0.0072 | 0.0051 | 0.0033 | 0.0059 | 0.0048 | 0.0064 | 0.0045 | 0.0062 | 0.0057 |        | 0.9914 |
|                                                                                               | Effective development of destination brand                                                                         | 0.0060 | 0.0072 | 0.0052 | 0.0035 | 0.0060 | 0.0051 | 0.0065 | 0.0055 | 0.0063 | 0.0057 |        | 0.9935 |
| Criteria 10 =<br>How important is the undertaking that it attributes to the following aspects | The company's employees recognize the importance of innovation for competitiveness                                 | 0.0073 | 0.0072 | 0.0049 | 0.0031 | 0.0058 | 0.0045 | 0.0063 | 0.0045 | 0.0061 | 0.0055 | 0.9875 | 0.9883 |
|                                                                                               | The company has mechanisms that assist it in the management of new products from the idea of its launch            | 0.0062 | 0.0071 | 0.0051 | 0.0034 | 0.0059 | 0.0049 | 0.0064 | 0.0056 | 0.0062 | 0.0057 |        | 0.9933 |
|                                                                                               | The structure of the company does not compromise innovation, but helps its development                             | 0.0068 | 0.0073 | 0.0048 | 0.0030 | 0.0058 | 0.0045 | 0.0063 | 0.0048 | 0.0061 | 0.0055 |        | 0.9889 |
|                                                                                               | There is a great commitment to the training of employees                                                           | 0.0062 | 0.0070 | 0.0050 | 0.0034 | 0.0059 | 0.0051 | 0.0065 | 0.0065 | 0.0063 | 0.0056 |        | 0.9933 |
|                                                                                               | The company has a good relationship (win-win) with suppliers                                                       | 0.0073 | 0.0073 | 0.0048 | 0.0030 | 0.0057 | 0.0045 | 0.0063 | 0.0054 | 0.0061 | 0.0055 |        | 0.9885 |
|                                                                                               | The company's innovation strategy is shared clearly with all employees so that they know the goals to be fulfilled | 0.0071 | 0.0073 | 0.0046 | 0.0028 | 0.0057 | 0.0043 | 0.0063 | 0.0052 | 0.0060 | 0.0054 |        | 0.9872 |
|                                                                                               |                                                                                                                    |        |        |        |        |        |        |        |        |        |        |        |        |

|                                                                                                                           |        |        |        |        |        |        |        |        |        |        |        |
|---------------------------------------------------------------------------------------------------------------------------|--------|--------|--------|--------|--------|--------|--------|--------|--------|--------|--------|
| Innovation projects are usually met on time and on budget                                                                 | 0.0058 | 0.0072 | 0.0048 | 0.0031 | 0.0058 | 0.0046 | 0.0064 | 0.0060 | 0.0062 | 0.0055 | 0.9910 |
| Employees work well together and also across departmental boundaries                                                      | 0.0070 | 0.0073 | 0.0047 | 0.0029 | 0.0057 | 0.0045 | 0.0063 | 0.0060 | 0.0061 | 0.0054 | 0.9885 |
| The company spends time reviewing our projects to improve them and performance in the following actions                   | 0.0063 | 0.0074 | 0.0045 | 0.0027 | 0.0056 | 0.0042 | 0.0062 | 0.0057 | 0.0060 | 0.0053 | 0.9873 |
| The company understands very well the needs of its consumers / end users                                                  | 0.0079 | 0.0075 | 0.0044 | 0.0024 | 0.0055 | 0.0040 | 0.0062 | 0.0055 | 0.0059 | 0.0052 | 0.9817 |
| Employees recognize that it is important for the organization to be competitive. distinguishing competence (s)            | 0.0074 | 0.0075 | 0.0044 | 0.0025 | 0.0055 | 0.0041 | 0.0062 | 0.0058 | 0.0059 | 0.0052 | 0.9837 |
| The company has mechanisms that verify that all consumer needs are really understood (not just at the marketing level)    | 0.0067 | 0.0074 | 0.0045 | 0.0026 | 0.0056 | 0.0042 | 0.0062 | 0.0066 | 0.0060 | 0.0052 | 0.9859 |
| Employees are involved in suggesting ideas to improve products or processes                                               | 0.0077 | 0.0076 | 0.0043 | 0.0024 | 0.0055 | 0.0040 | 0.0062 | 0.0064 | 0.0059 | 0.0051 | 0.9815 |
| The organization works with universities and other research centers that can help you develop your knowledge              | 0.0040 | 0.0063 | 0.0060 | 0.0051 | 0.0064 | 0.0069 | 0.0069 | 0.0197 | 0.0069 | 0.0062 | 0.9484 |
| The company analyzes its errors in order to improve its activities and processes                                          | 0.0071 | 0.0076 | 0.0043 | 0.0025 | 0.0055 | 0.0041 | 0.0062 | 0.0073 | 0.0059 | 0.0051 | 0.9821 |
| The company looks to the future in order to anticipate threats and opportunities (using tools and forecasting techniques) | 0.0064 | 0.0075 | 0.0044 | 0.0026 | 0.0055 | 0.0042 | 0.0062 | 0.0080 | 0.0059 | 0.0052 | 0.9829 |
| The company has process management mechanisms that allow it to tailor procedures to ensure its ultimate success           | 0.0059 | 0.0075 | 0.0044 | 0.0025 | 0.0055 | 0.0041 | 0.0062 | 0.0080 | 0.0059 | 0.0051 | 0.9821 |
| The structure of the company helps to make quick decisions                                                                | 0.0081 | 0.0077 | 0.0041 | 0.0022 | 0.0053 | 0.0038 | 0.0061 | 0.0074 | 0.0058 | 0.0050 | 0.9760 |
| The company works very close to its consumers in order to develop new concepts                                            | 0.0076 | 0.0077 | 0.0041 | 0.0022 | 0.0053 | 0.0038 | 0.0061 | 0.0077 | 0.0058 | 0.0050 | 0.9765 |

|                                                                                                              |                                                                                                                                             |        |        |        |        |        |        |        |        |        |        |        |        |
|--------------------------------------------------------------------------------------------------------------|---------------------------------------------------------------------------------------------------------------------------------------------|--------|--------|--------|--------|--------|--------|--------|--------|--------|--------|--------|--------|
| Criteria 11 =<br>What degree of importance do you attach to the following aspects in relation to the company | The company systematically compares its products and processes with those of its competitors                                                | 0.0081 | 0.0077 | 0.0041 | 0.0022 | 0.0053 | 0.0038 | 0.0061 | 0.0085 | 0.0058 | 0.0049 | 0.9550 | 0.9739 |
|                                                                                                              | The employees (/ professionals?) Who occupy top positions have a come innovation as a determining factor for the development of the company | 0.0072 | 0.0076 | 0.0042 | 0.0023 | 0.0054 | 0.0039 | 0.0061 | 0.0087 | 0.0058 | 0.0050 |        | 0.9764 |
|                                                                                                              | The company searches for new ideas for new products in a systematic way                                                                     | 0.0075 | 0.0077 | 0.0040 | 0.0021 | 0.0053 | 0.0037 | 0.0061 | 0.0085 | 0.0057 | 0.0049 |        | 0.9735 |
|                                                                                                              | Communication between the various levels of hierarchy works effectively                                                                     | 0.0076 | 0.0077 | 0.0040 | 0.0021 | 0.0053 | 0.0037 | 0.0061 | 0.0088 | 0.0058 | 0.0049 |        | 0.9721 |
|                                                                                                              | The company collaborates with other companies in the development of new products or processes                                               | 0.0051 | 0.0071 | 0.0045 | 0.0029 | 0.0056 | 0.0045 | 0.0063 | 0.0137 | 0.0061 | 0.0052 |        | 0.9624 |
|                                                                                                              | The company shares experiences with other companies that help them understand them                                                          | 0.0053 | 0.0073 | 0.0044 | 0.0026 | 0.0055 | 0.0043 | 0.0063 | 0.0127 | 0.0060 | 0.0051 |        | 0.9643 |
|                                                                                                              | Those in top positions show a commitment to support innovation                                                                              | 0.0077 | 0.0079 | 0.0038 | 0.0019 | 0.0052 | 0.0035 | 0.0060 | 0.0093 | 0.0057 | 0.0047 |        | 0.9671 |
|                                                                                                              | The company has mechanisms that ensure the involvement of all departments in the development of new products or processes                   | 0.0068 | 0.0076 | 0.0040 | 0.0022 | 0.0053 | 0.0038 | 0.0061 | 0.0116 | 0.0058 | 0.0049 |        | 0.9637 |
|                                                                                                              | The company has a system of support and reward for innovation initiatives                                                                   | 0.0053 | 0.0071 | 0.0045 | 0.0028 | 0.0055 | 0.0045 | 0.0063 | 0.0186 | 0.0061 | 0.0052 |        | 0.9347 |
|                                                                                                              | The company tries to develop external networks with individuals who can assist it (for example with experts in specific knowledge)          | 0.0059 | 0.0074 | 0.0041 | 0.0024 | 0.0053 | 0.0040 | 0.0062 | 0.0137 | 0.0059 | 0.0049 |        | 0.9558 |
|                                                                                                              | The company records its developmental evolution so that other people in the organization can take advantage of such learning                | 0.0054 | 0.0074 | 0.0042 | 0.0024 | 0.0054 | 0.0041 | 0.0062 | 0.0152 | 0.0059 | 0.0050 |        | 0.9482 |

|                                                                                                 |                                                                                                                                               |        |        |        |        |        |        |        |        |        |        |        |        |
|-------------------------------------------------------------------------------------------------|-----------------------------------------------------------------------------------------------------------------------------------------------|--------|--------|--------|--------|--------|--------|--------|--------|--------|--------|--------|--------|
|                                                                                                 | The organization has mechanisms to analyze the new technological and market developments and what their impact on the organization's strategy | 0.0049 | 0.0076 | 0.0040 | 0.0022 | 0.0053 | 0.0038 | 0.0061 | 0.0141 | 0.0058 | 0.0049 |        | 0.9498 |
|                                                                                                 | The organization has a clear system of choosing innovation projects                                                                           | 0.0050 | 0.0076 | 0.0040 | 0.0022 | 0.0053 | 0.0038 | 0.0061 | 0.0151 | 0.0058 | 0.0048 |        | 0.9433 |
|                                                                                                 | The organization has a favorable climate for the creation of new ideas, which encourages employees to make their proposals                    | 0.0065 | 0.0079 | 0.0037 | 0.0019 | 0.0051 | 0.0034 | 0.0060 | 0.0125 | 0.0056 | 0.0046 |        | 0.9526 |
|                                                                                                 | The organization shares its needs and competencies with education agencies                                                                    | 0.0045 | 0.0074 | 0.0042 | 0.0024 | 0.0054 | 0.0041 | 0.0062 | 0.0209 | 0.0059 | 0.0050 |        | 0.9113 |
|                                                                                                 | The organization learns from other organizations                                                                                              | 0.0071 | 0.0080 | 0.0036 | 0.0016 | 0.0050 | 0.0032 | 0.0059 | 0.0121 | 0.0055 | 0.0045 |        | 0.9496 |
|                                                                                                 | There is a clear link between innovation projects and the entire business strategy                                                            | 0.0057 | 0.0078 | 0.0037 | 0.0019 | 0.0051 | 0.0035 | 0.0060 | 0.0144 | 0.0056 | 0.0046 |        | 0.9419 |
|                                                                                                 | The organization's system is flexible and helps the quick realization of small projects                                                       | 0.0066 | 0.0081 | 0.0035 | 0.0016 | 0.0049 | 0.0032 | 0.0059 | 0.0134 | 0.0055 | 0.0045 |        | 0.9423 |
|                                                                                                 | The organization works well as a team (or teams)                                                                                              | 0.0081 | 0.0081 | 0.0035 | 0.0016 | 0.0049 | 0.0031 | 0.0059 | 0.0136 | 0.0054 | 0.0044 |        | 0.9384 |
|                                                                                                 | The organization works closely with users of its new products or services                                                                     | 0.0076 | 0.0082 | 0.0035 | 0.0016 | 0.0049 | 0.0031 | 0.0059 | 0.0135 | 0.0055 | 0.0044 |        | 0.9391 |
|                                                                                                 | The organization uses measures that help you identify where and when you can improve your innovation                                          | 0.0068 | 0.0080 | 0.0035 | 0.0017 | 0.0049 | 0.0033 | 0.0059 | 0.0164 | 0.0055 | 0.0045 |        | 0.9267 |
| Criteria 12 =<br>How much importance do you attach to the following innovation-related aspects? | Financing                                                                                                                                     | 0.0072 | 0.0078 | 0.0037 | 0.0018 | 0.0050 | 0.0034 | 0.0060 | 0.0195 | 0.0056 | 0.0046 | 0.8573 | 0.9111 |
|                                                                                                 | Insufficient equity                                                                                                                           | 0.0062 | 0.0077 | 0.0036 | 0.0018 | 0.0050 | 0.0033 | 0.0060 | 0.0199 | 0.0056 | 0.0045 |        | 0.9062 |
|                                                                                                 | Insufficient external capital                                                                                                                 | 0.0051 | 0.0072 | 0.0039 | 0.0021 | 0.0052 | 0.0037 | 0.0061 | 0.0285 | 0.0057 | 0.0047 |        | 0.8577 |
|                                                                                                 | High wage costs                                                                                                                               | 0.0050 | 0.0074 | 0.0038 | 0.0020 | 0.0051 | 0.0035 | 0.0060 | 0.0264 | 0.0057 | 0.0046 |        | 0.8662 |
|                                                                                                 | Difficult forecast of demand                                                                                                                  | 0.0052 | 0.0079 | 0.0035 | 0.0016 | 0.0049 | 0.0032 | 0.0059 | 0.0207 | 0.0055 | 0.0044 |        | 0.8944 |
|                                                                                                 | Lack of qualified staff                                                                                                                       | 0.0061 | 0.0077 | 0.0035 | 0.0016 | 0.0049 | 0.0032 | 0.0059 | 0.0221 | 0.0055 | 0.0044 |        | 0.8877 |
|                                                                                                 | Investigation and development                                                                                                                 | 0.0058 | 0.0075 | 0.0036 | 0.0018 | 0.0050 | 0.0034 | 0.0060 | 0.0296 | 0.0056 | 0.0045 |        | 0.8452 |
|                                                                                                 | Production                                                                                                                                    | 0.0053 | 0.0079 | 0.0035 | 0.0016 | 0.0049 | 0.0032 | 0.0059 | 0.0267 | 0.0055 | 0.0044 |        | 0.8554 |
|                                                                                                 | Marketing and Sales                                                                                                                           | 0.0072 | 0.0084 | 0.0031 | 0.0013 | 0.0047 | 0.0028 | 0.0058 | 0.0190 | 0.0053 | 0.0041 |        | 0.8972 |

|                                   |        |        |        |        |        |        |        |        |        |        |        |
|-----------------------------------|--------|--------|--------|--------|--------|--------|--------|--------|--------|--------|--------|
| Innovations difficult to organize | 0.0046 | 0.0079 | 0.0035 | 0.0016 | 0.0049 | 0.0032 | 0.0059 | 0.0272 | 0.0055 | 0.0044 | 0.8497 |
| Cooperation possibilities         |        |        |        |        |        |        |        |        |        |        |        |
| Insufficient                      | 0.0042 | 0.0078 | 0.0034 | 0.0016 | 0.0049 | 0.0032 | 0.0059 | 0.0266 | 0.0055 | 0.0044 | 0.8505 |
| With other companies              | 0.0037 | 0.0077 | 0.0035 | 0.0016 | 0.0049 | 0.0032 | 0.0059 | 0.0308 | 0.0056 | 0.0044 | 0.8206 |
| With research organizations       | 0.0041 | 0.0079 | 0.0033 | 0.0015 | 0.0048 | 0.0030 | 0.0059 | 0.0271 | 0.0055 | 0.0043 | 0.8428 |
| Insufficient access to knowledge  |        |        |        |        |        |        |        |        |        |        |        |
| produced in universities and      |        |        |        |        |        |        |        |        |        |        |        |
| research centers                  | 0.0039 | 0.0075 | 0.0035 | 0.0017 | 0.0049 | 0.0032 | 0.0059 | 0.0342 | 0.0056 | 0.0044 | 0.8017 |
| Insufficient access to external   |        |        |        |        |        |        |        |        |        |        |        |
| information                       | 0.0044 | 0.0079 | 0.0033 | 0.0015 | 0.0047 | 0.0030 | 0.0059 | 0.0296 | 0.0054 | 0.0042 | 0.8266 |
| Other obstacles                   | 0.0038 | 0.0077 | 0.0033 | 0.0015 | 0.0048 | 0.0031 | 0.0059 | 0.0359 | 0.0055 | 0.0043 | 0.7851 |

**Table A3.** Results for the Chronbach's alpha for each criterion/construct.

| <b>Criteria</b>                                                           | <b>Normalized Cronbach's Alpha</b> | <b>Confidence Interval</b> |
|---------------------------------------------------------------------------|------------------------------------|----------------------------|
| Criteria 7                                                                | 0.972                              | 0.958, 0.980               |
| Criteria 8                                                                | 0.970                              | 0.958, 0.978               |
| Criteria 9                                                                | 0.974                              | 0.964, 0.982               |
| Criteria 10                                                               | 0.957                              | 0.943, 0.968               |
| Criteria 11                                                               | 0.964                              | 0.953, 0.973               |
| Criteria 12                                                               | 0.945                              | 0.921, 0.961               |
| <b>Confidence Interval of 95% under 1000 times bootstrap replications</b> |                                    |                            |

**Table A4.** Results for the cluster validity tests

| <b>Methods</b> | <b>Number of clusters</b> | <b>Value Index</b> |
|----------------|---------------------------|--------------------|
| KL             | 11                        | 10.78              |
| CH             | 7                         | 511.03             |
| Hartigan       | 3                         | 75.39              |
| CCC            | 2                         | 73.79              |
| Scott          | 15                        | 259.47             |
| Marriot        | 3                         | 0.00               |
| TrCovW         | 3                         | 0.00               |
| TraceW         | 3                         | 0.03               |
| Friedman       | 11                        | 649479.63          |
| Rubin          | 7                         | -1080.41           |
| Cindex         | 14                        | 0.07               |
| DB             | 2                         | 0.51               |
| Silhouette     | 2                         | 0.75               |
| Duda           | 2                         | 0.96               |
| PseudoT2       | 2                         | 4.41               |
| Beale          | 2                         | 0.32               |
| Ratkowsky      | 2                         | 0.36               |
| Ball           | 3                         | 0.03               |
| PtBiserial     | 2                         | 0.84               |
| Gap            | 2                         | 0.55               |
| Frey           | 2                         | 5.30               |
| McClain        | 2                         | 0.06               |
| Gamma          | 2                         | 0.97               |
| Gplus          | 2                         | 23.44              |
| Tau            | 4                         | 2400.62            |
| Dunn           | 2                         | 0.13               |
| Hubert         | 0                         | 0.00               |
| SDindex        | 4                         | 191.33             |

|                                                       |    |      |
|-------------------------------------------------------|----|------|
| Dindex                                                | 0  | 0.00 |
| SDBw                                                  | 13 | 0.09 |
| The Hubert index and D index are graphical parameters |    |      |

**Table A5.** Cluster Validity Summary

| Number of clusters | Number of Methods |
|--------------------|-------------------|
| 2                  | 14                |
| 3                  | 5                 |
| 4                  | 2                 |
| 7                  | 2                 |
| 11                 | 2                 |
| 13                 | 1                 |
| 14                 | 1                 |
| 15                 | 1                 |
